# Supplementary material for: ORAI2 Promotes Gastric Cancer Tumorigenicity and Metastasis through PI3K/Akt Signaling and MAPK-Dependent Focal Adhesion Disassembly
Source: Oxford University Press journal article supplement (doi:10.1158/0008-5472.can-20-0049), 2020-12-11
Supplement: 00085472can200049-sup-235111_2_supp_6739436_qk4q56.docx [file 00085472can200049-sup-235111_2_supp_6739436_qk4q56.docx]

**
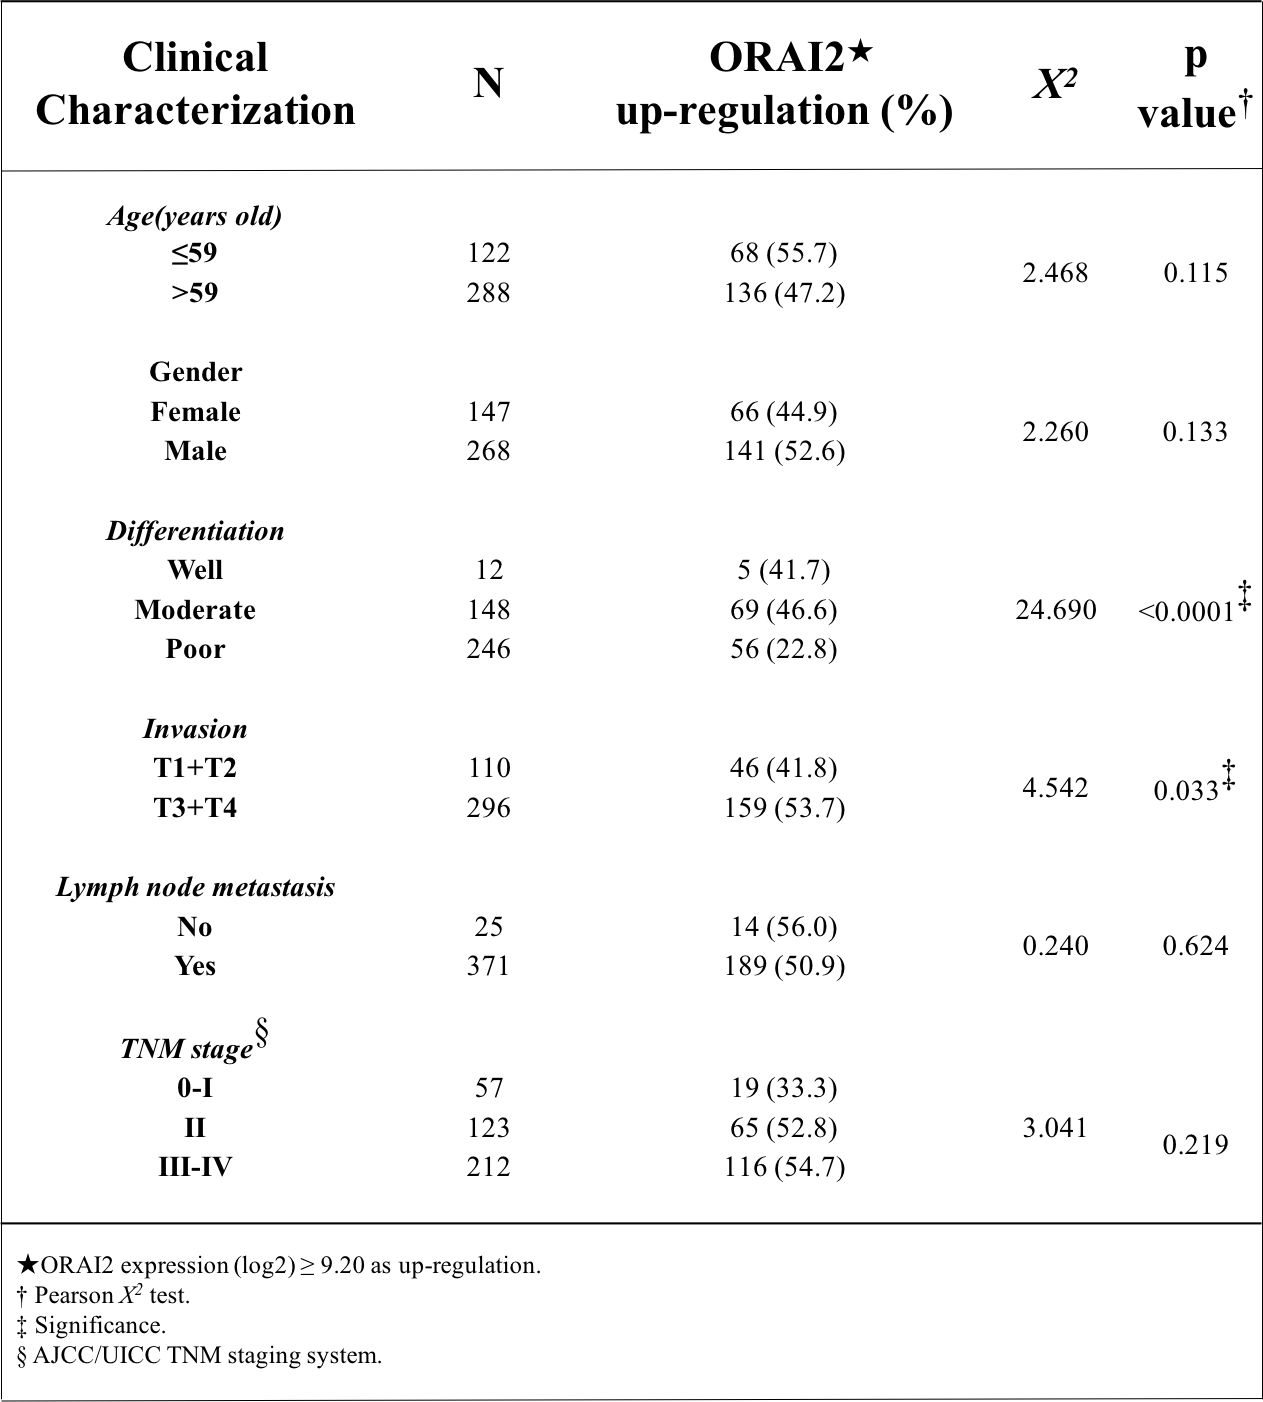
**

**Supplementary Table 1**. Association of ORAI2 expression with clinicopathologic features in 412 primary GC cases.


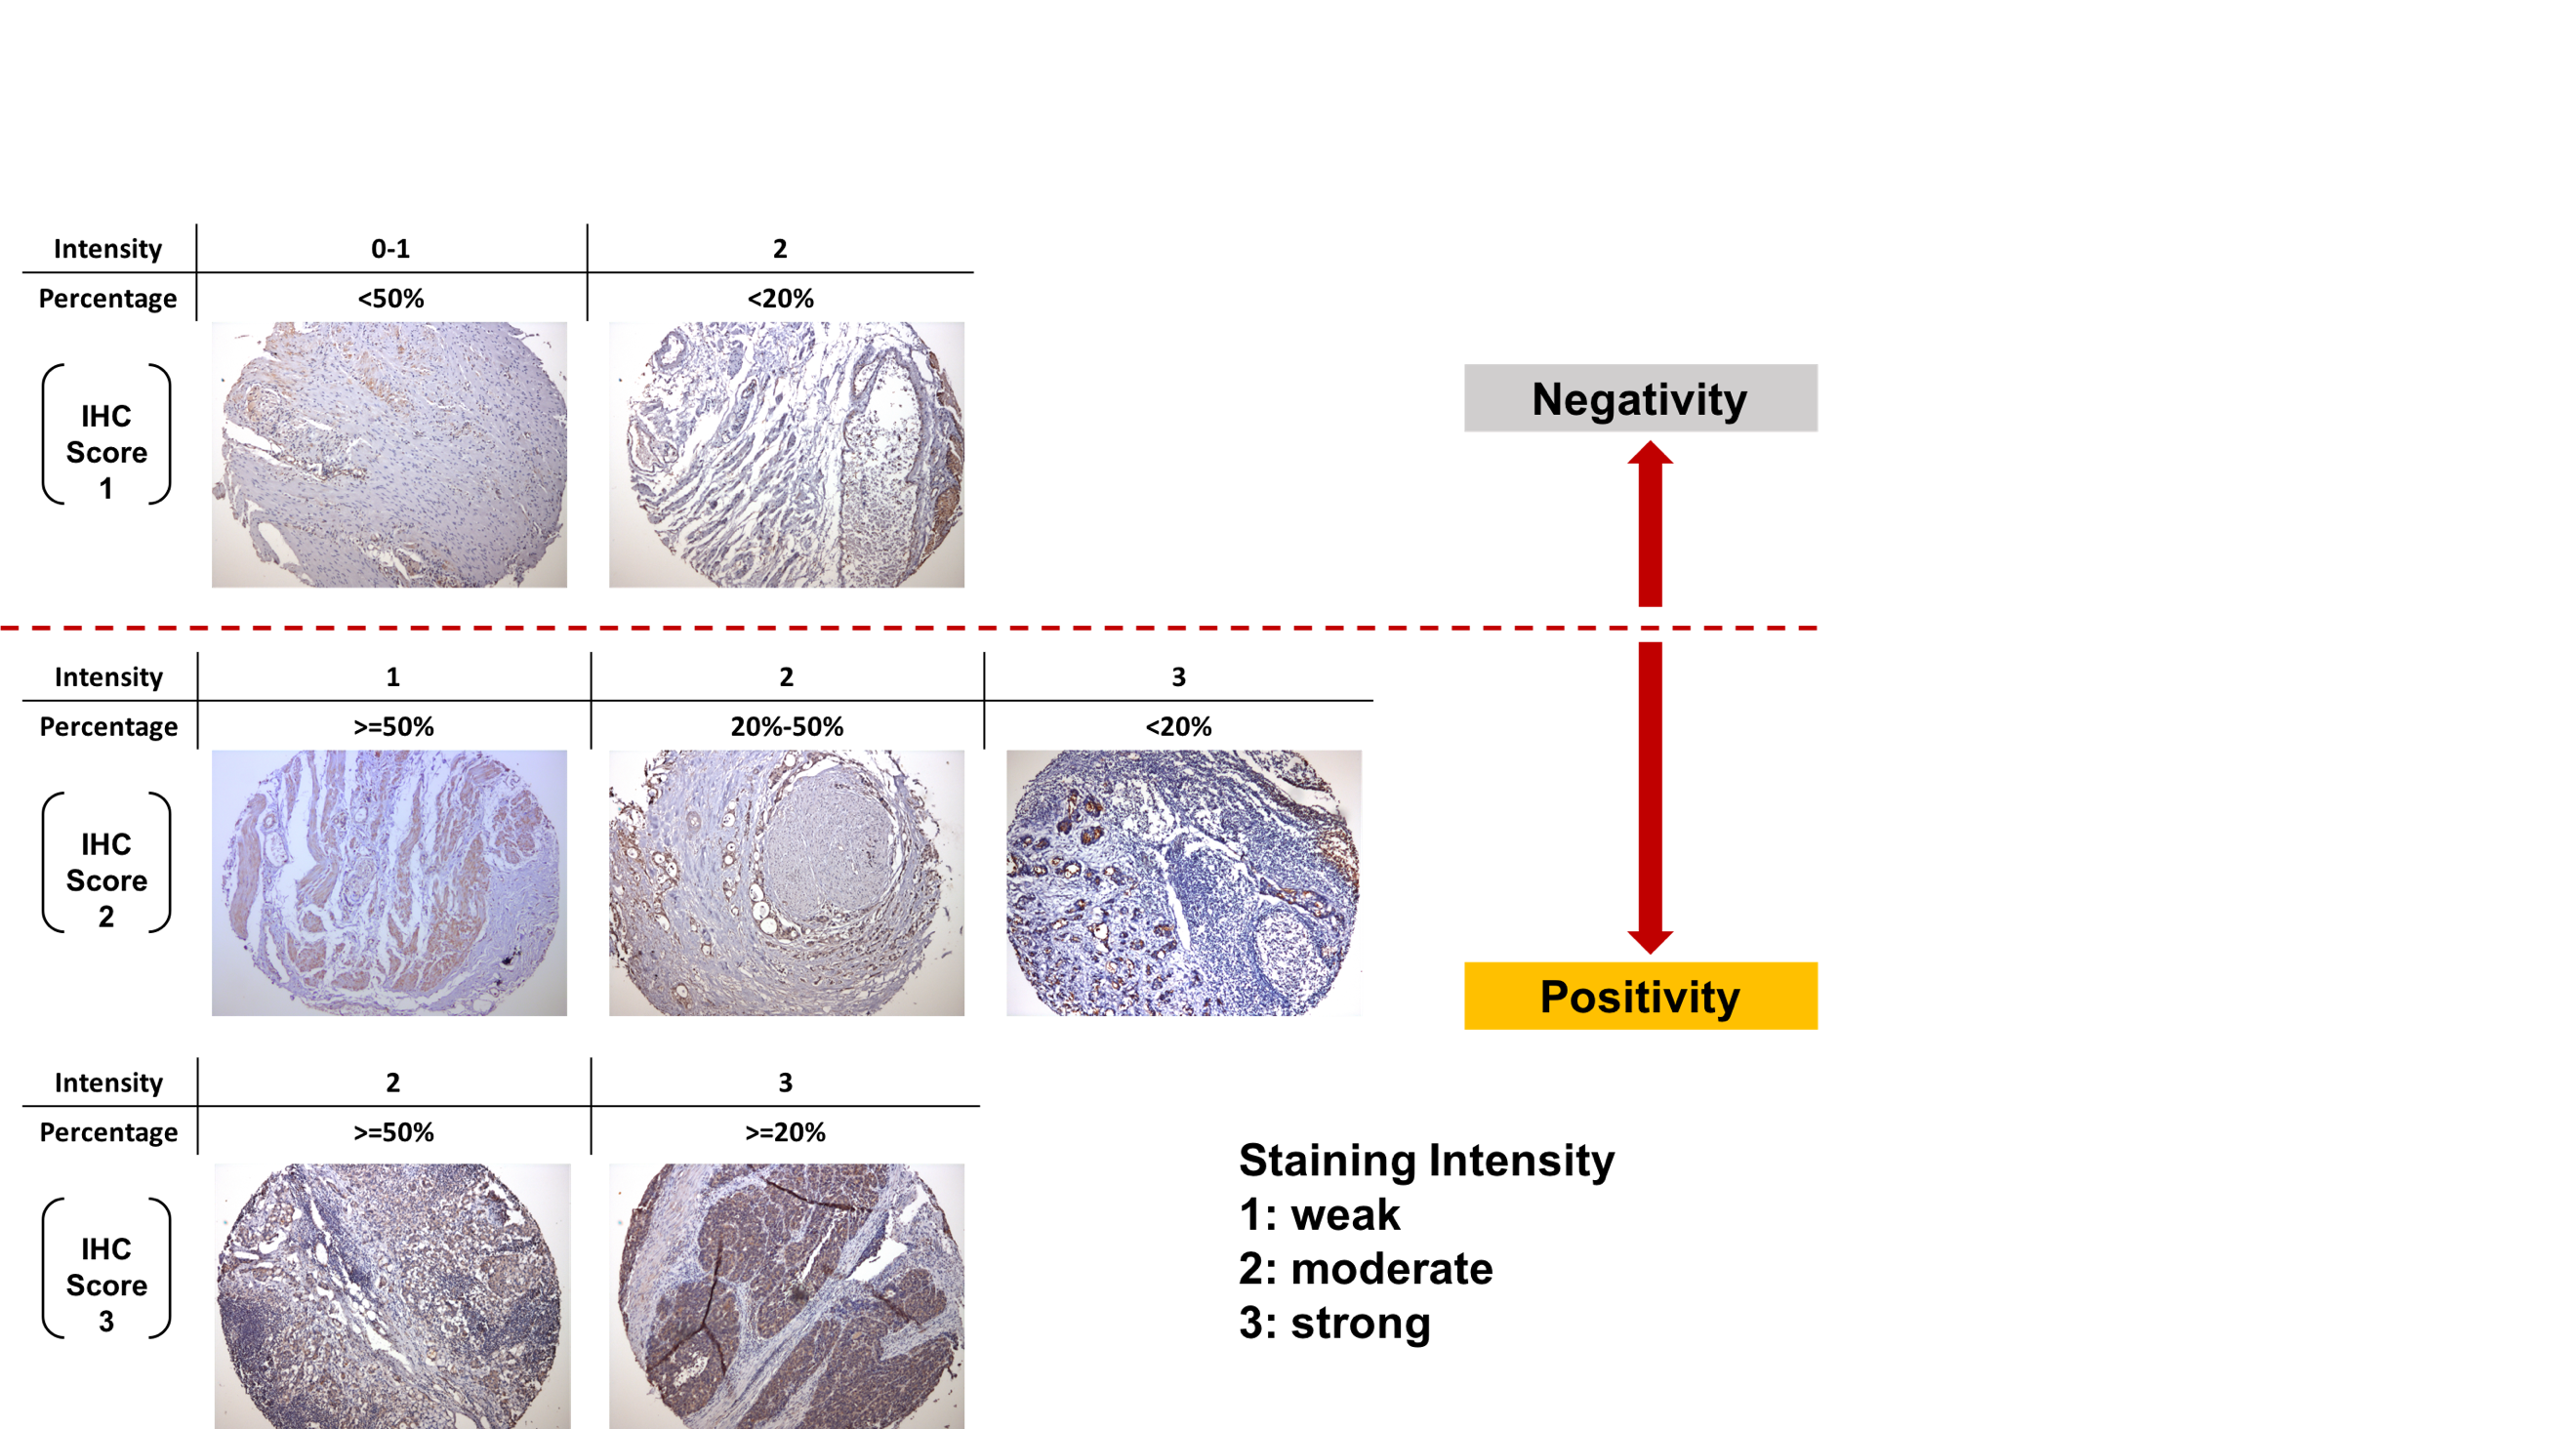


**Supplementary Figure 1.** IHC scoring standard of TMA.

**
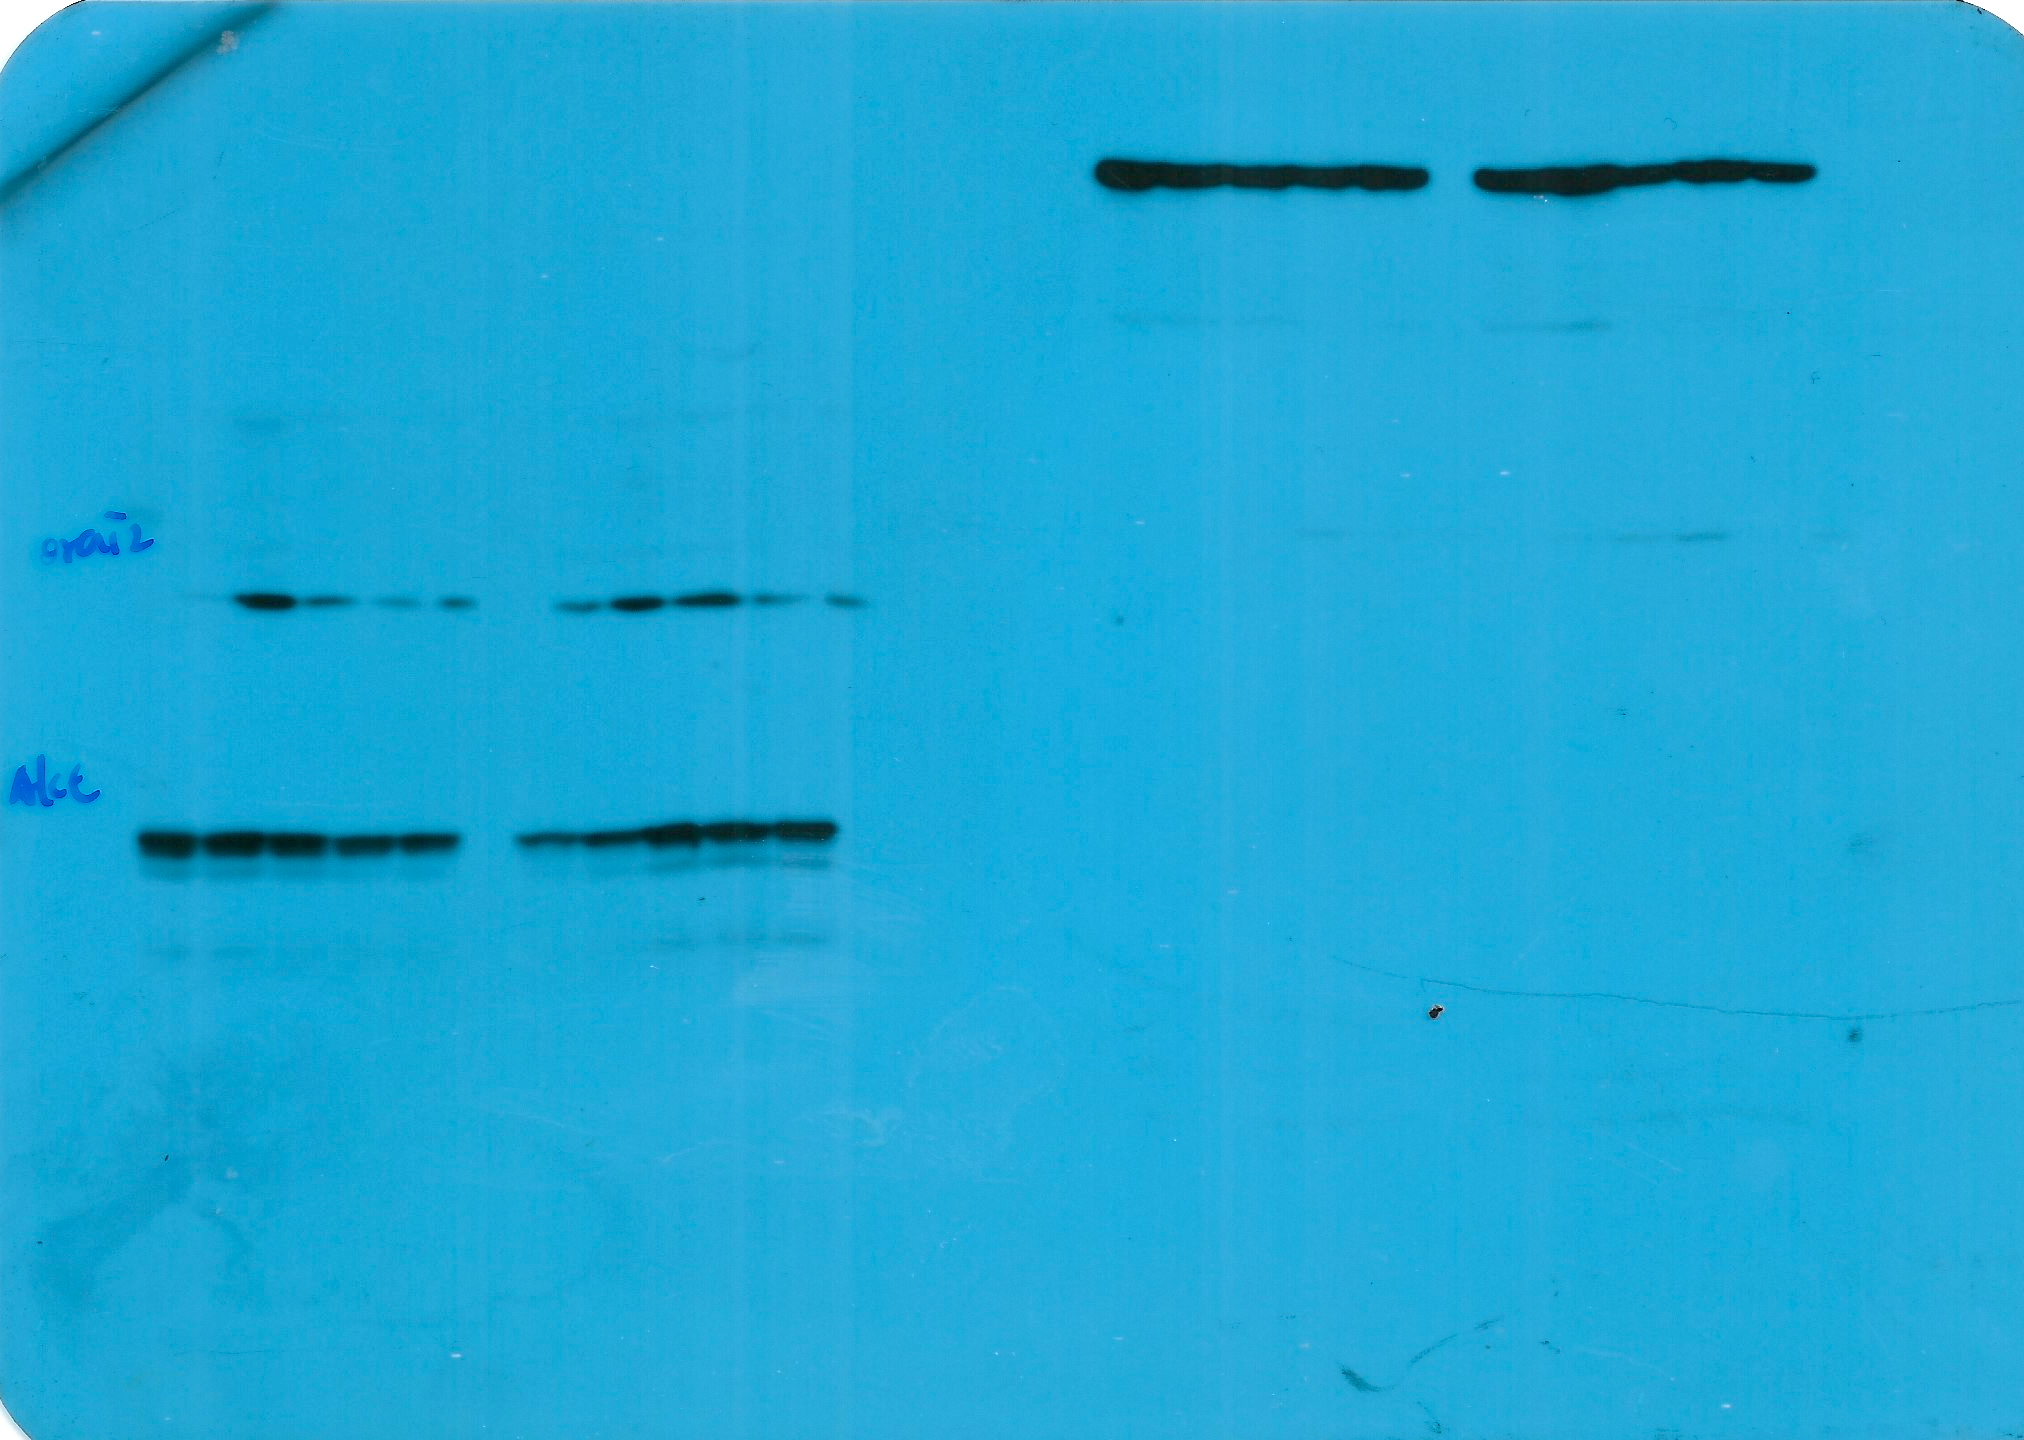
**

**Supplementary Figure 2.** Full blots of ORAI2, total Akt and Beta actin.

**Supplementary Figure 3.** References of 2 μM thapsigargin (TG)-induced Ca2+ release in ORAI2-overexpressed and repressed GC cells.


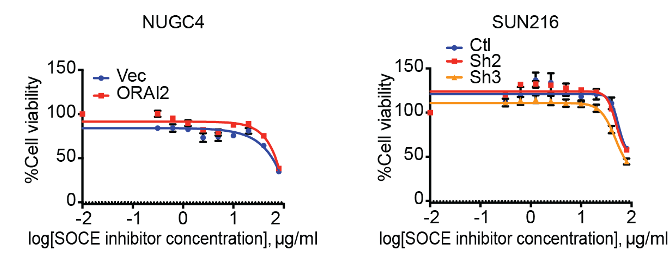
**Supplementary Figure 4.** [IC50]c of SOCE inhibitor SKF96365 in GC cells. The IC50 of SKF96365 for NUGC4-Vec is 47.46 µM and for NUGC4-ORAI2 is 74.81 µM; The IC50 of SKF96365 for SUN216-Ctl is 482.7 µM, for SUN216-Sh2 is 423.7 µM and for SUN216-Sh3 is 140.9 µM.

**Supplementary Figure 5.** [IC50]c of 2-APB inhibitor in GC cells. The IC50 of 2-APB for NUGC4-Vec is 50.02 µM and for NUGC4-ORAI2 is 127.8 µM.

**
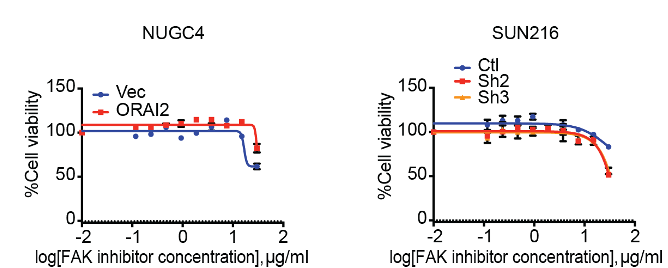
**

**Supplementary Figure 6.** [IC50]c of FAK inhibitor Y15 in GC cells. The IC50 of Y15 for NUGC4-Vec is 100.7 µM and for NUGC4-ORAI2 is 717 µM; The IC50 of Y15 for SUN216-Ctl is 254.6 µM, for SUN216-Sh2 is 55.69 µM and for SUN216-Sh3 is 59.85 µM.


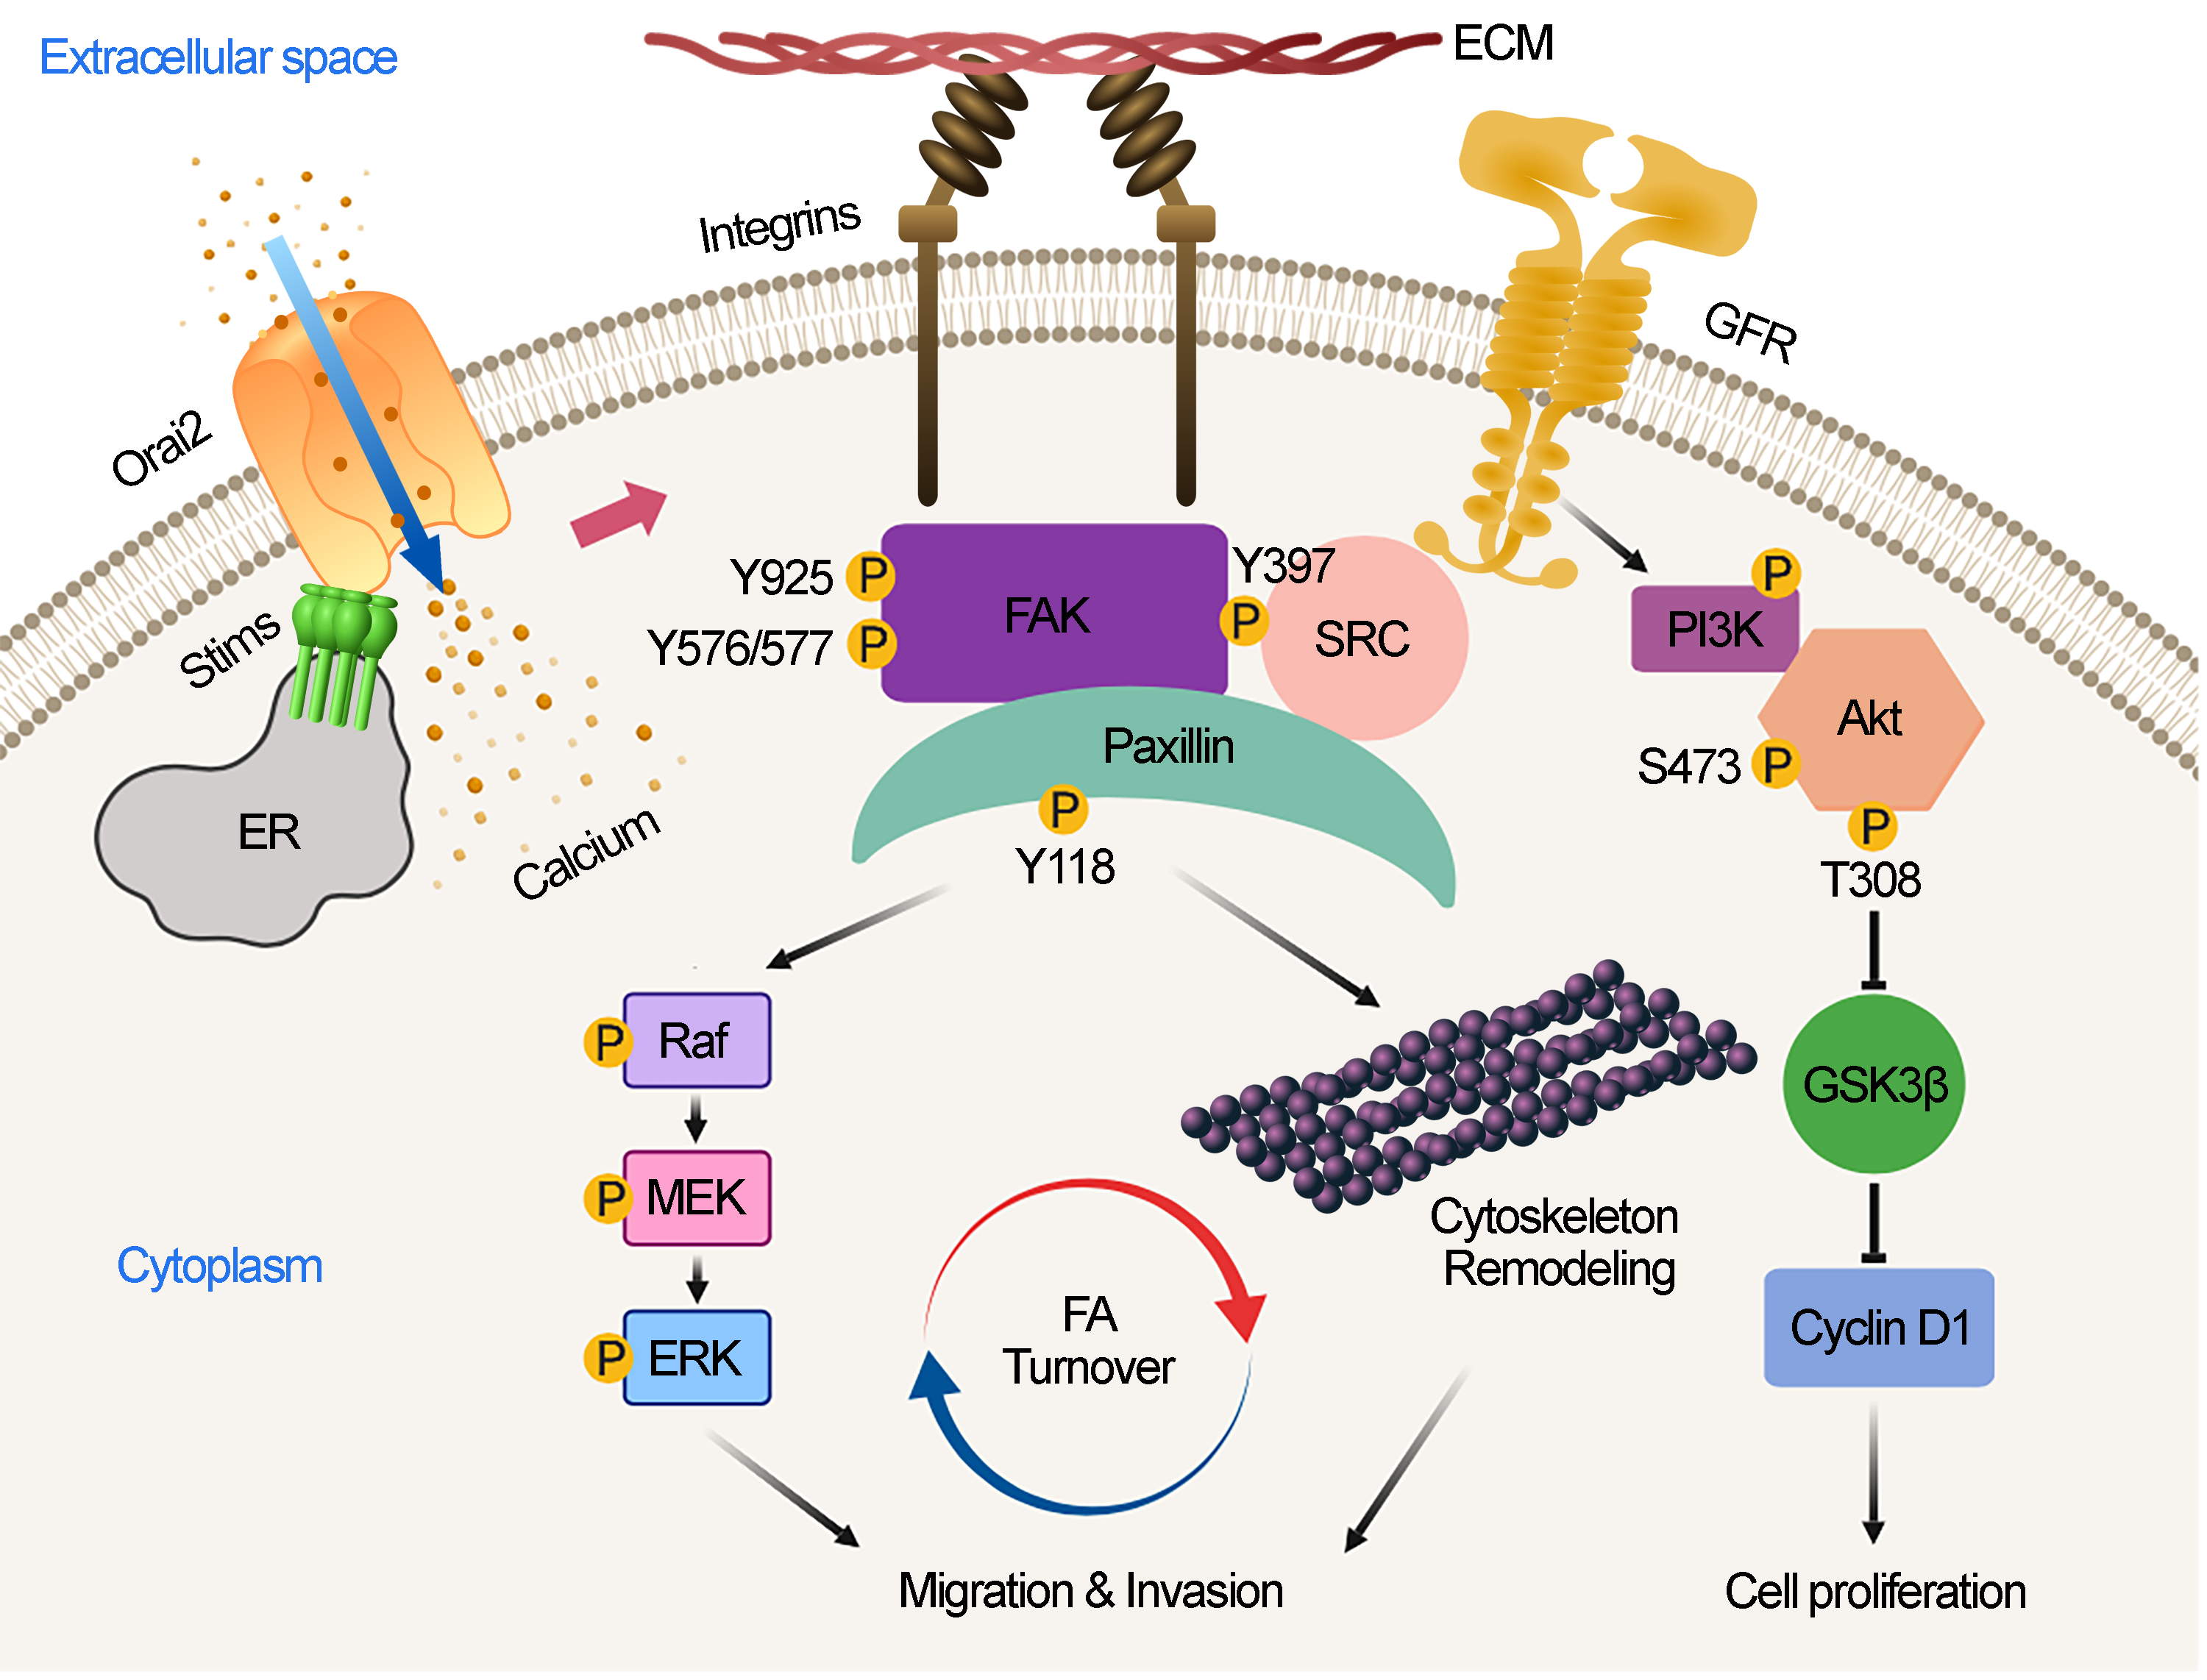


**Supplementary Figure 7.** Scheme of the mechanism by which ORAI2 affects GC cell proliferation, migration and invasion.

**Supplementary Video 1.** 216-Ctl: fluorescence recovery time after FRAP.

**Supplementary Video 2.** 216-Sh2: fluorescence recovery time after FRAP.

**Supplementary Video 3.** 216-Sh3: fluorescence recovery time after FRAP.
